# Supplementary material for: A machine-learning approach for dynamic prediction of sepsis-induced coagulopathy in critically ill patients with sepsis: an integrated analysis of the MIMIC-IV and eICU-CRD databases
Source: Research Square preprint supplement (doi:10.21203/rs.3.rs-125438/v1), 2020-12-11
Supplement: Supplementary file 1 [file 14e2d6a0569fadfe7f2eef72.docx]

Table S1. Sepsis‐induced coagulopathy (SIC) criteria

|  | Score | Range |
| --- | --- | --- |
| Platelet count (−109/L) | 2 | < 100 |
|  | 1 | ≧ 100, < 150 |
| INR | 2 | > 1.4 |
|  | 1 | > 1.2, ≦1.4 |
| SOFA score | 2 | ≧ 2 |
|  | 1 | 1 |
| Total score for SIC |  | ≧ 4 |

SOFA score is the sum of 4 items (respiratory SOFA, cardiovascular SOFA, hepatic SOFA, renal SOFA).

Abbreviations: SIC sepsis‐induced coagulopathy, INR international normalized ratio, SOFA sequential organ failure assessment.

Table S3. Hyperparameter search domain in Bayesian Optimization and final settings

| Hyperparameters | Search domain | Final setting |
| --- | --- | --- |
| 'depth' | [2, 8] (integer) | 3 |
| 'bagging_temperature' | [1, 50] | 44.2 |
| 'reg_lambda' | [1, 200] | 106.6 |
| 'learning_rate' | [0.01, 0.2] | 0.081 |
| 'min_data_in_leaf' | [1, 3] | 1 |

Table S4. Results of Logistic Regression

|  | **Coef.** | **OR** | **95% CI** | **Std.Err.** | **z** | **P>|z|** |
| --- | --- | --- | --- | --- | --- | --- |
| **Hypertension** | 0.289 | 0.749 | [0.699, 0.803] | 0.035 | 8.236 | <0.001 |
| **DM** | -0.048 | 1.049 | [0.969, 1.135] | 0.040 | -1.183 | 0.237 |
| **COPD** | 0.270 | 0.763 | [0.708, 0.824] | 0.039 | 6.943 | <0.001 |
| **CHF** | 0.188 | 0.829 | [0.770, 0.893] | 0.038 | 4.938 | <0.001 |
| **MI** | -0.037 | 1.038 | [0.936, 1.151] | 0.053 | -0.711 | 0.477 |
| **CKD** | -0.112 | 1.119 | [1.036, 1.209] | 0.040 | -2.840 | 0.005 |
| **Leukemia** | -1.339 | 3.815 | [2.989, 4.865] | 0.124 | -10.779 | <0.001 |
| **Strokes** | -0.705 | 2.024 | [1.815, 2.255] | 0.055 | -12.724 | <0.001 |
| **Cancer** | 0.437 | 0.646 | [0.600, 0.696] | 0.038 | 11.526 | <0.001 |
| **Liver disease** | -0.224 | 1.251 | [1.133, 1.383] | 0.051 | -4.420 | <0.001 |
| **Age** | 0.012 | 0.988 | [0.986, 0.991] | 0.001 | 9.176 | <0.001 |
| **Gender** | 0.083 | 0.920 | [0.860, 0.984] | 0.034 | 2.434 | 0.015 |
| **BMI** | 0.004 | 0.996 | [0.993, 0.999] | 0.002 | 2.662 | 0.008 |
| **Admission type 1** | -0.246 | 1.279 | [1.185, 1.380] | 0.039 | -6.333 | <0.001 |
| **Admission type 2** | 0.472 | 0.624 | [0.523, 0.744] | 0.090 | 5.252 | <0.001 |
| **Admission type 3** | -0.241 | 1.273 | [1.175, 1.379] | 0.041 | -5.912 | <0.001 |
| **Ethnicity 1** | 0.202 | 0.817 | [0.738, 0.904] | 0.052 | 3.903 | <0.001 |
| **Ethnicity 2** | -0.974 | 2.649 | [2.010, 3.490] | 0.141 | -6.927 | <0.001 |
| **Ethnicity 3** | 0.707 | 0.493 | [0.435, 0.559] | 0.064 | 10.980 | <0.001 |
| **Ethnicity 4** | -0.652 | 1.919 | [0.842, 4.371] | 0.420 | -1.551 | 0.121 |
| **Ethnicity 5** | -0.017 | 1.017 | [0.933, 1.108] | 0.044 | -0.388 | 0.698 |
| **SAPS-II** | 0.010 | 0.990 | [0.988, 0.993] | 0.001 | 7.646 | <0.001 |
| **GCS** | 0.035 | 0.966 | [0.947, 0.985] | 0.010 | 3.529 | <0.001 |
| **Heart rate** | 0.007 | 0.993 | [0.991, 0.995] | 0.001 | 6.189 | <0.001 |
| **Respiratory rate** | 0.004 | 0.996 | [0.974, 1.018] | 0.011 | 0.339 | 0.735 |
| **MAP** | -0.005 | 1.005 | [1.003, 1.008] | 0.001 | -3.774 | <0.001 |
| **SpO2** | 0.026 | 0.974 | [0.959, 0.990] | 0.008 | 3.210 | 0.001 |
| **Temperature** | -0.073 | 1.076 | [1.021, 1.133] | 0.026 | -2.748 | 0.006 |
| **Plateau pressure** | 0.013 | 0.987 | [0.979, 0.994] | 0.004 | 3.464 | 0.001 |
| **Tidal volume** | 0.000 | 1.000 | [0.999, 1.000] | 0.000 | 1.003 | 0.316 |
| **PEEP** | -0.009 | 1.009 | [0.996, 1.022] | 0.006 | -1.376 | 0.169 |
| **RSBI** | -0.002 | 1.002 | [0.997, 1.007] | 0.003 | -0.914 | 0.361 |
| **Albumin** | 0.185 | 0.831 | [0.732, 0.944] | 0.065 | 2.853 | 0.004 |
| **Total protein** | -0.219 | 1.245 | [1.100, 1.408] | 0.063 | -3.476 | 0.001 |
| **Anion gap** | 0.011 | 0.989 | [0.975, 1.003] | 0.007 | 1.514 | 0.130 |
| **BUN** | -0.007 | 1.007 | [1.005, 1.008] | 0.001 | -8.538 | <0.001 |
| **Creatinine** | 0.150 | 0.861 | [0.836, 0.886] | 0.015 | 10.138 | <0.001 |
| **Globulin** | 0.094 | 0.910 | [0.803, 1.033] | 0.064 | 1.467 | 0.142 |
| **Fibrinogen** | 0.000 | 1.000 | [1.000, 1.000] | 0.000 | -0.105 | 0.916 |
| **INR** | 0.179 | 0.836 | [0.616, 1.135] | 0.156 | 1.147 | 0.251 |
| **PT** | -0.009 | 1.009 | [0.980, 1.039] | 0.015 | -0.597 | 0.551 |
| **PTT** | 0.008 | 0.992 | [0.990, 0.993] | 0.001 | 10.545 | <0.001 |
| **ALT** | -0.001 | 1.001 | [1.000, 1.002] | 0.000 | -3.568 | <0.001 |
| **AST** | 0.001 | 0.999 | [0.999, 1.000] | 0.000 | 3.228 | 0.001 |
| **ALP** | 0.000 | 1.000 | [1.000, 1.001] | 0.000 | -4.369 | <0.001 |
| **Total bilirubin** | 0.106 | 0.899 | [0.829, 0.976] | 0.042 | 2.536 | 0.011 |
| **Direct bilirubin** | -0.101 | 1.106 | [1.005, 1.219] | 0.049 | -2.052 | 0.040 |
| **Indirect bilirubin** | -0.057 | 1.059 | [0.935, 1.198] | 0.063 | -0.897 | 0.370 |
| **MCH** | -0.305 | 1.357 | [1.146, 1.606] | 0.086 | -3.541 | <0.001 |
| **MCHC** | 0.261 | 0.770 | [0.660, 0.899] | 0.079 | 3.293 | 0.001 |
| **MCV** | 0.092 | 0.912 | [0.865, 0.961] | 0.027 | 3.442 | 0.001 |
| **Platelet** | -0.001 | 1.001 | [1.000, 1.001] | 0.000 | -5.815 | <0.001 |
| **RBC** | 0.089 | 0.915 | [0.591, 1.418] | 0.223 | 0.397 | 0.691 |
| **RDW** | 0.034 | 0.967 | [0.953, 0.981] | 0.007 | 4.614 | <0.001 |
| **WBC** | 0.000 | 1.000 | [0.996, 1.004] | 0.002 | 0.181 | 0.857 |
| **pH** | -1.091 | 2.977 | [0.541, 16.395] | 0.871 | -1.253 | 0.210 |
| **PaO2** | -0.001 | 1.001 | [0.999, 1.002] | 0.001 | -0.996 | 0.319 |
| **PaCO2** | -0.014 | 1.014 | [1.002, 1.025] | 0.006 | -2.356 | 0.018 |
| **FiO2** | -0.003 | 1.003 | [0.994, 1.011] | 0.004 | -0.631 | 0.528 |
| **PaO2/FiO2** | 0.001 | 0.999 | [0.999, 1.000] | 0.000 | 1.648 | 0.099 |
| **SO2** | -0.002 | 1.002 | [0.996, 1.008] | 0.003 | -0.594 | 0.553 |
| **BE** | -0.005 | 1.005 | [0.957, 1.055] | 0.025 | -0.200 | 0.842 |
| **Bicarbonate** | -0.030 | 1.030 | [1.018, 1.043] | 0.006 | -4.870 | <0.001 |
| **AADO2** | 0.001 | 0.999 | [0.998, 1.001] | 0.001 | 0.998 | 0.318 |
| **Total CO2** | 0.041 | 0.960 | [0.920, 1.001] | 0.021 | 1.913 | 0.056 |
| **Hematocrit** | -0.002 | 1.002 | [0.950, 1.058] | 0.027 | -0.087 | 0.930 |
| **Hemoglobin** | 0.003 | 0.997 | [0.836, 1.188] | 0.090 | 0.037 | 0.971 |
| **Chloride** | 0.001 | 0.999 | [0.988, 1.010] | 0.006 | 0.195 | 0.845 |
| **Calcium** | -0.011 | 1.011 | [0.983, 1.039] | 0.014 | -0.765 | 0.444 |
| **Potassium** | 0.006 | 0.994 | [0.942, 1.048] | 0.027 | 0.231 | 0.817 |
| **Sodium** | 0.009 | 0.991 | [0.980, 1.002] | 0.006 | 1.529 | 0.126 |
| **Lactate** | 0.062 | 0.940 | [0.908, 0.971] | 0.017 | 3.666 | <0.001 |
| **Glucose** | 0.000 | 1.000 | [1.000, 1.001] | 0.000 | -2.438 | 0.015 |
| **SpO2/FiO2** | 0.065 | 0.937 | [0.728, 1.208] | 0.129 | 0.500 | 0.617 |
| **ROX index** | -2.705 | 14.954 | [0.668, 334.956] | 1.586 | -1.705 | 0.088 |
| **Urine output** | 0.000 | 1.000 | [1.000, 1.000] | 0.000 | -0.259 | 0.796 |
| **SIC platelet** | 0.539 | 0.583 | [0.541, 0.629] | 0.039 | 13.989 | <0.001 |
| **SIC INR** | 0.332 | 0.717 | [0.682, 0.755] | 0.026 | 12.796 | <0.001 |
| **Respiratory SOFA** | 0.014 | 0.986 | [0.955, 1.017] | 0.016 | 0.893 | 0.372 |
| **Liver SOFA** | 0.074 | 0.929 | [0.868, 0.994] | 0.035 | 2.141 | 0.032 |
| **Renal SOFA** | 0.046 | 0.955 | [0.928, 0.984] | 0.015 | 3.064 | 0.002 |
| **Cardiovascular SOFA** | -0.032 | 1.033 | [0.999, 1.068] | 0.017 | -1.887 | 0.059 |
| **SIC days** | 0.083 | 0.920 | [0.915, 0.926] | 0.003 | 28.877 | <0.001 |
| **RBC Transfusion** | 0.000 | 1.000 | [1.000, 1.000] | 0.000 | -1.207 | 0.228 |
| **FFP Transfusion** | 0.000 | 1.000 | [0.999, 1.000] | 0.000 | 0.977 | 0.329 |
| **PLT Transfusion** | 0.002 | 0.998 | [0.997, 0.999] | 0.001 | 3.496 | <0.001 |
| **Heparin use** | -0.133 | 1.142 | [1.068, 1.221] | 0.034 | -3.890 | <0.001 |
| **Heparin days** | -0.013 | 1.013 | [1.009, 1.017] | 0.002 | -6.694 | <0.001 |
| **Antibiotic types** | 0.074 | 0.929 | [0.900, 0.957] | 0.015 | 4.823 | <0.001 |
| **Linezolid** | 0.039 | 0.962 | [0.821, 1.127] | 0.081 | 0.478 | 0.633 |
| **Vancomycin** | -0.209 | 1.232 | [1.141, 1.330] | 0.039 | -5.359 | <0.001 |
| **CRRT use** | 0.085 | 0.919 | [0.817, 1.031] | 0.060 | 1.432 | 0.152 |
| **Vasopressor use** | 0.179 | 0.836 | [0.764, 0.915] | 0.046 | 3.891 | <0.001 |
| **MV durations** | -0.001 | 1.001 | [1.001, 1.001] | 0.000 | -12.630 | <0.001 |

Admission type 0: Emergency (reference); Admission type 1: Urgent; Admission type 2: Elective; Admission type 3: Other; Ethnicity 0: White (reference); Ethnicity 1: Black; Ethnicity 2: Asian; Ethnicity 3: Hispanic; Ethnicity 4: Native; Ethnicity 5: Other/Unknown

Fig S1. Model performance in different patient cohorts in MIMIC-IV

Different validation sets were derived based on SPAS-II (A), age (B), ethnicity (C) and time since sepsis onset (D). AUC of the full and the compact models in each set was measured by using bootstrap method. The colored area represents 95% confidence intervals.

Abbreviations: Full the full model, Comp the compact model, AUC area under receiver operating characteristic curve, SAPS-II Simplified Acute Physiology Score-IV.

Fig S2. Model interpretation of the full model in eICU-CRD

Fig S3. Model interpretation of the compact model in eICU-CRD
